# Supplementary material
Source: Springer Nature journal article supplement (https://www.springermedizin.de/resource/supplementary/13054_2014_2570_MOESM4_ESM.pdf/9714424)

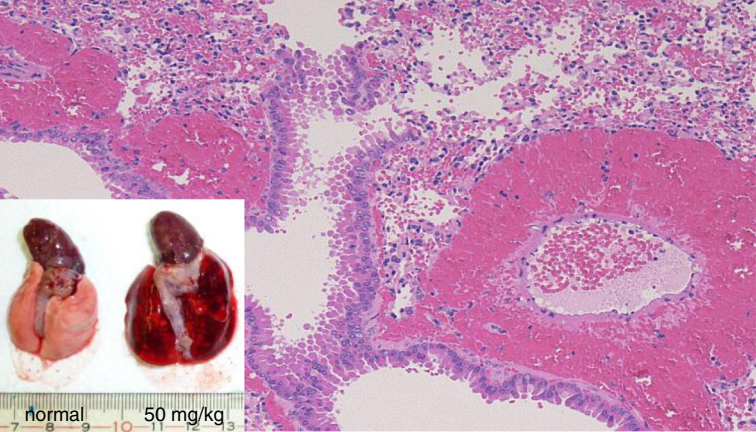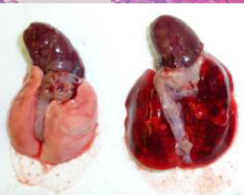

normal

50 mg/kg

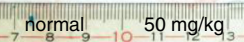

Supplement: MOESM4 [file 9714424]
